# Supplementary material for: Human IPSC-Derived Model to Study Myelin Disruption
Source: MDPI journal article supplement (doi:10.3390/ijms22179473), 2021-08-31
Supplement: s1 [file s1]

Neural progenitor cell mycoplasma testing report

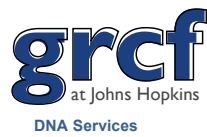

Laura Kasch-Semenza  
Johns Hopkins University  
2760 Light House Point East, Suite 201  
Baltimore, Maryland 21224  
Phone: 410-614-3830  
Email: lkasch@jhmi.edu

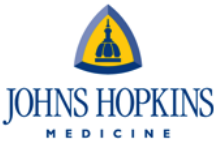

Mycoplasma Testing Report

\*  
Date: July 24, 2017  
Customer: Thomas Hartung  
Institution: Johns Hopkins University \* \* \* \* \*  
Person requesting: Shelly-Ann Odwin-DaCosta  
GeneSifter ID number: 138034  
%

| Sample Annotation: |          |
|--------------------|----------|
| Chip Number:       | 30005498 |
| Well:              | A6       |
| Sample ID:         | 1        |

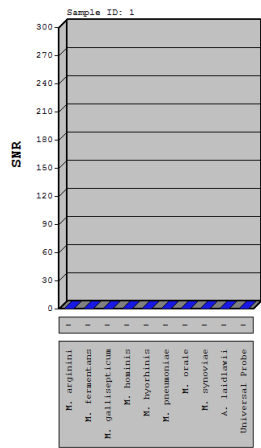

| Bacterium        | SNR | Result   | Level |
|------------------|-----|----------|-------|
| M. arginini      | 0   | negative | -     |
| M. fermentans    | 0   | negative | -     |
| M. gallisepticum | 0   | negative | -     |
| M. hominis       | 0   | negative | -     |
| M. hyorhinitis   | 0   | negative | -     |
| M. pneumoniae    | 0   | negative | -     |
| M. orale         | 0   | negative | -     |
| M. synoviae      | 0   | negative | -     |
| A. laidlawii     | 0   | negative | -     |
| Universal Probe  | 0   | negative | -     |

%

GRCF services may only be used for research purposes. Any data or samples generated by the facility may not be used for human diagnostic or therapeutic use.

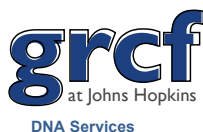

Laura Kasch-Semenza  
Johns Hopkins University  
2760 Light House Point East, Suite 201  
Baltimore, Maryland 21224  
Phone: 410-614-3830  
Email: lkasch@jhmi.edu

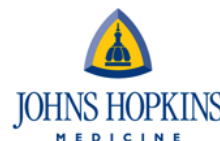

## Mycoplasma\*Testing\*

\*

The GRCF's mycoplasma test uses a PCR based MycoDtect™ kit from Greiner Bio-One North America, Inc. (Monroe, NC) to PCR amplify the 16S – 23S intergenic spacer region with a highly conserved fluorescent primer pair. The amplified fragments are hybridized to a MycoDtect™ DNA-array. A universal mycoplasma DNA-probe tests for the presence of all mycoplasma species, while species-specific probes detect nine of the most common mycoplasma. Each array is run with positive and negative controls in addition to internal DNA isolation and PCR controls for each cell line sample.

### Procedure\*

DNA is extracted from the cell culture cells and supernatant using a DNeasy Blood & Tissue kit automated on a QIAcube (Qiagen). A MycoDtect internal control is added to each sample prior to isolation to monitor the DNA extraction process and template use for the amplification. The DNA is polymerase chain amplified (PCR) for the 16S-23S rRNA intergenic spacer region of any mycoplasma species present using a highly conserved Cy5 fluorescent labeled primer pair. A PCR control within the PCR MasterMix allows for validation of the PCR. The labeled products are hybridized to complementary sequences on the MycoDtect chip. Each mycoplasma species, the universal probe, and internal and PCR controls are detected by five measuring points on the chip. Non-specifically bound probes are removed by washing. The bound and labeled probes are detected by stimulation with monochromatic light and analyzed using CheckReport software. Appropriate positive and negative controls were used.

The MycoDtect assay will detect both viable and non-viable mycoplasma, it will not distinguish between the two.

### Sensitivity\*

The limit of detection determined by the manufacturer with the universal probe for the nine specific species identified is 1 colony forming unit (CFU), except M. fermentans, which is 10 CFU.

Greiner Bio-One has tested MycoDtect™ and determined the universal probe to detect the following forty Mollicutes species: A. axanthum, A. laidlawii, A. modicum, A. morum, A. oculi, A. vituli, M. alkalescens, M. arginini, M. arthritis, M. bovis genitalium, M. bovirhinis, M. bovis, M. bovoculi, M. buccale, M. californicum, M. canadense, M. canis, M. eqhvirhinis, M. faucium, M. fermentans, M. flocculare, M. gallinaceum, M. gallinarum, M. gallisepticum, M. genitalium, M. glycyphilium, M. hominis, M. hyopharyngis, M. hyopneumoniae, M. hyorhinis, M. hyosynoviae, M. orale, M. pirum, M. pneumoniae, M. pulmonis, M. salivarium, M. synoviae, S. citri, S. kunkelii, U. diversum, U. urealyticum.

Below are species-specific mycoplasmas detected with MycoDtect, the natural host, and likely sources of contamination.

| Species          | Host of mycoplasma species | Source of contamination |
|------------------|----------------------------|-------------------------|
| M. orale         | human                      | laboratory personnel    |
| M. fermentans    | human                      | laboratory personnel    |
| M. hominis       | human                      | laboratory personnel    |
| M. pneumoniae    | human                      | laboratory personnel    |
| M. arginini      | bovine                     | serum                   |
| A. laidlawii     | bovine                     | serum                   |
| M. hyorhinis     | swine                      | serum                   |
| M. gallisepticum | poultry                    | media                   |
| M. synoviae      | poultry                    | media                   |

\*

*GRCF services may only be used for research purposes. Any data or samples generated by the facility may not be used for human diagnostic or therapeutic use.*

*Neural progenitor cell karyotyping report*

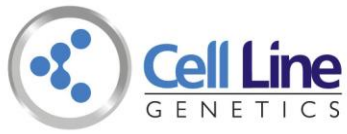

Case name: CLG-19146

Cell Line Name: NPC GEO 1 p16

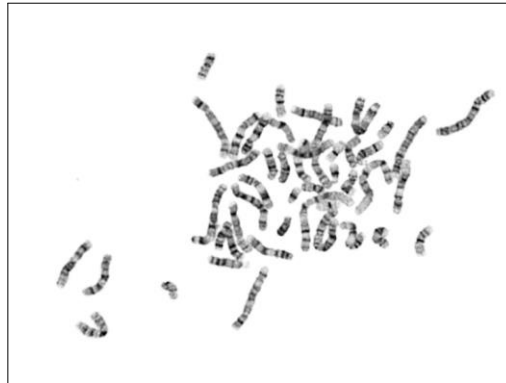

Result: 46,XY,add(18)(q21)

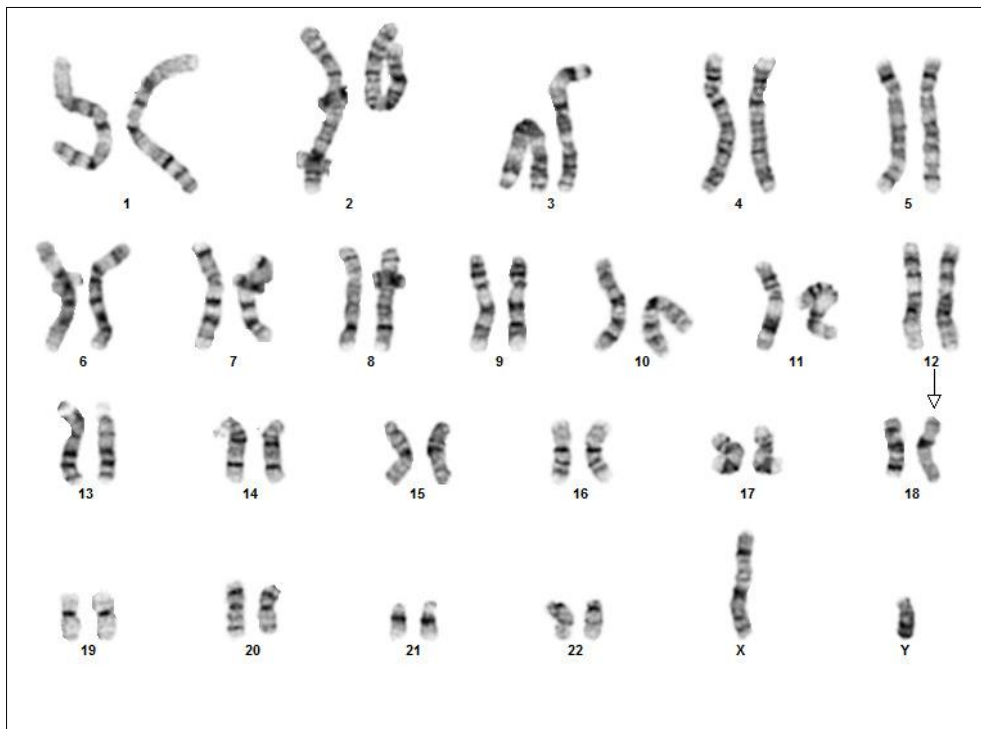

Case: CLG-19146 Slide: 1 Cell: 16

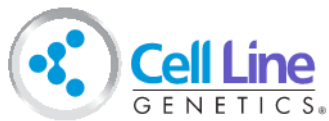

## Cell Line Characterization

**Cell Line ID:** NPC GEO1

**Passage #:** 16

**Specimen Type:** Human Neuronal Precursor Culture

**Indication for Study:** Routine Culture QC

**Lab #:** CLG-19146

**PI:** Not Specified

**Contact Person:** Ruth Brady

**Email:** rbrady1@jhu.edu

**Address:**

Johns Hopkins University  
615 N. Wolfe St W7032  
Baltimore, Maryland 21205

**Test Code:** 100

**Date Received:** 2/19/15

**Account #:** NA

**Date Reported:** 3/2/15

**PO #:** NA

**Time in Culture:** 1 day

**Additional copies sent to:**

**Banding Technique:** GTL      **Band Resolution:** Fair  
**Metaphases Counted:** 20    **Analyzed:** 7    **Karyotyped:** 4

**RESULTS:** 46,XY,add(18)(q21)[17]      ABNORMAL Human Male Karyotype

**Non-clonal Aberrations:** 46,XY,del(2)(q32.2),add(18)(q21)  
45,XY,-14,add(18)(q21)  
45,XY,-16,add(18)(q21)

**INTERPRETATION:**

Cytogenetic analysis was performed on twenty G-banded metaphase cells from human cell line NPC GEO1 p16 and all twenty cells demonstrated an addition of unknown genetic material to the long-arm of chromosome 18 at band 18q21. Three of these cells also demonstrated non-clonal chromosome aberrations (listed above) which are most likely artifacts of culture.
