# Supplementary material for: Human IPSC-Derived Model to Study Myelin Disruption
Source: MDPI journal article supplement (doi:10.3390/ijms22179473), 2021-08-31
Supplement: s1 [file s1]

# Supplementary table 1.

Environmental exposures linked to impairment of central nervous system myelination during development.

| Compound Name(s)                              | Chemical Formula                                                | Molecular weight (g/mol) | CAS number | Supplier                   | Product Number | Conc.            | Solubility                        |                  |                      | Myelin DNT Ref.                                            |
|-----------------------------------------------|-----------------------------------------------------------------|--------------------------|------------|----------------------------|----------------|------------------|-----------------------------------|------------------|----------------------|------------------------------------------------------------|
|                                               |                                                                 |                          |            |                            |                |                  | Conc.                             | Solvent          | Ref.                 |                                                            |
| Bisphenol A (BPA)                             | C <sub>15</sub> H <sub>16</sub> O <sub>2</sub>                  | 228.291                  | 80-05-7    | Sigma Aldrich              | 239658-50G     | -                | 0.298 g/L at 25°C                 | H <sub>2</sub> O | Sigma Aldrich        | (Xu et al., 2017; Tiwari et al., 2015; Seiwa et al., 2004) |
| 2,4-Dichlorophenoxyacetic acid (2,4-D)        | C <sub>8</sub> H <sub>6</sub> Cl <sub>2</sub> O <sub>3</sub>    | 221.033                  | 94-75-7    | Sigma Aldrich              | D7299-100G     | -                | 100 mg/ml                         | 95% EtOH         | Sigma Aldrich        | (Konjuh et al., 2008)                                      |
|                                               |                                                                 |                          |            |                            |                |                  | 30 mg/ml                          | EtOH, DMF, DMSO  | Cayman Chem.         |                                                            |
|                                               |                                                                 |                          |            |                            |                |                  | 540 ppm at 20°C                   | H <sub>2</sub> O | Pub-Chem             |                                                            |
| Tris(1,3-dichloro-2-propyl) phosphate (TDCPP) | C <sub>9</sub> H <sub>15</sub> Cl <sub>6</sub> O <sub>4</sub> P | 430.889                  | 13674-87-8 | Sigma Aldrich              | 32951-100MG    | -                | 0.0181 g/L at 20°C                | H <sub>2</sub> O | Sigma Aldrich        | (Wang et al., 2015)                                        |
| Bis(cyclohexanone)oxaldihydrazone (Cuprizone) | C <sub>14</sub> H <sub>22</sub> N <sub>4</sub> O <sub>2</sub>   | 278.356                  | 370-81-0   | Sigma Aldrich              | 14690-100G     | -                | 9.0x10 <sup>-7</sup> mg/L at 20°C | H <sub>2</sub> O | Pub-Chem             | (Wang et al., 2013; Cammer, 1999) Abe et al. 2015          |
| Sodium metavanadate                           | NaO <sub>3</sub> V                                              | 121.928                  | 13718-26-8 | Sigma Aldrich              | 72060-100G     |                  |                                   |                  |                      | (Mustapha et al., 2014)                                    |
| Nicotine                                      | C <sub>10</sub> H <sub>14</sub> N <sub>2</sub>                  | 162.236                  | 54-11-5    | Sigma Aldrich              | 613215-1EA     | 20 mg/mL in DMSO |                                   |                  |                      | (Cao et al., 2013)                                         |
| Pentabromodiphenyl oxide (DE-71)              | C <sub>12</sub> H <sub>5</sub> Br <sub>5</sub> O                | 564.691                  | 32534-81-9 | Great Lakes Chemical Corp. |                | 20.1 mM          | 25 mM                             | DMSO             | Giordano et al. 2008 | (Chen et al., 2012)                                        |
| Methylmercury                                 | CH <sub>3</sub> Hg <sup>+</sup>                                 | 215.627                  | 22967-92-6 |                            |                |                  |                                   |                  |                      | (Padhi and Pelletier, 2012)                                |

Cammer, W. (1999). The neurotoxicant, cuprizone, retards the differentiation of oligodendrocytes in vitro.

*Journal of the Neurological Sciences* 168, 116-120. doi:Doi 10.1016/S0022-510x(99)00181-1

Cao, J., Wang, J., Dwyer, J. B. et al. (2013). Gestational nicotine exposure modifies myelin gene expression in the brains of adolescent rats with sex differences. *Transl Psychiatry* 3, e247.

doi:10.1038/tp.2013.21

Chen, L., Huang, C., Hu, C. et al. (2012). Acute exposure to de-71: Effects on locomotor behavior and developmental neurotoxicity in zebrafish larvae. *Environ Toxicol Chem* 31, 2338-2344.

doi:10.1002/etc.1958

- Konjuh, C., Garcia, G., Lopez, L. et al. (2008). Neonatal hypomyelination by the herbicide 2,4-dichlorophenoxyacetic acid. Chemical and ultrastructural studies in rats. *Toxicological Sciences* 104, 332-340. doi:10.1093/toxsci/kfn085
- Mustapha, O., Oke, B., Offen, N. et al. (2014). Neurobehavioral and cytotoxic effects of vanadium during oligodendrocyte maturation: A protective role for erythropoietin. *Environmental Toxicology and Pharmacology* 38, 98-111. doi:10.1016/j.etap.2014.05.001
- Padhi, B. K. and Pelletier, G. (2012). Perturbation of myelin basic protein (mbp) splice variant expression in developing rat cerebellum following perinatal exposure to methylmercury. *Toxicology Letters* 213, 374-380. doi:10.1016/j.toxlet.2012.07.011
- Seiwa, C., Nakahara, J., Komiyama, T. et al. (2004). Bisphenol a exerts thyroid-hormone-like effects on mouse oligodendrocyte precursor cells. *Neuroendocrinology* 80, 21-30. doi:10.1159/000080663
- Tiwari, S. K., Agarwal, S., Chauhan, L. K. S. et al. (2015). Bisphenol-a impairs myelination potential during development in the hippocampus of the rat brain. *Molecular Neurobiology* 51, 1395-1416. doi:10.1007/s12035-014-8817-3
- Wang, H. K., Li, C. R., Wang, H. Z. et al. (2013). Cuprizone-induced demyelination in mice: Age-related vulnerability and exploratory behavior deficit. *Neuroscience Bulletin* 29, 251-259. doi:10.1007/s12264-013-1323-1
- Wang, Q., Lai, N. L., Wang, X. et al. (2015). Bioconcentration and transfer of the organophorous flame retardant 1,3-dichloro-2-propyl phosphate causes thyroid endocrine disruption and developmental neurotoxicity in zebrafish larvae. *Environ Sci Technol* 49, 5123-5132. doi:10.1021/acs.est.5b00558
- Xu, X. B., Fan, S. J., He, Y. et al. (2017). Loss of hippocampal oligodendrocytes contributes to the deficit of contextual fear learning in adult rats experiencing early bisphenol a exposure. *Mol Neurobiol* 54, 4524-4536. doi:10.1007/s12035-016-0003-3
