# Supplementary material for: Human IPSC-Derived Model to Study Myelin Disruption
Source: MDPI journal article supplement (doi:10.3390/ijms22179473), 2021-08-31
Supplement: s1 [file s1]

## 2.1.- Environmental exposures linked to impairment of central nervous system myelination during development

[illegible]

## 2.2.- Cytotoxicity and Myelin DNT

| Compound<br>(Abbreviation)                     | Cytotoxicity in vitro |                                                         |                    | Myelin DNT                                  |                                                |                                                                                                                                                                                                                                                                                                                                                                                     |                    |
|------------------------------------------------|-----------------------|---------------------------------------------------------|--------------------|---------------------------------------------|------------------------------------------------|-------------------------------------------------------------------------------------------------------------------------------------------------------------------------------------------------------------------------------------------------------------------------------------------------------------------------------------------------------------------------------------|--------------------|
|                                                | Conc.                 | notes                                                   | Ref.               | Conc. / Dose                                | in vivo/in vitro;<br>species                   | DNT Effect(s)                                                                                                                                                                                                                                                                                                                                                                       | Ref.               |
| Bisphenol A (BPA)                              | 100 $\mu$ M           | in vitro; rat oligospheres; highest non-cytotoxic conc. | Tiwari et al. 2015 | 0.1 mg/L H <sub>2</sub> O                   | in vivo; rat                                   | Disrupted OL ER signaling; enduring OL loss                                                                                                                                                                                                                                                                                                                                         | Xu et al. 2016     |
|                                                | 100 $\mu$ M           | In vitro; mouse OPCs; almost 100% cells viable          | Seiwa et al. 2004  | 100 $\mu$ M                                 | in vitro; rat OL spheres                       | Decreased viability, proliferation, and differentiation of OPCs; altered immunoreactivity of fluoromyelin, MBP, and myelin-associated glycoprotein; altered expression and protein levels of myelination-regulating genes; caused myelin structural changes                                                                                                                         | Tiwari et al. 2015 |
|                                                |                       |                                                         |                    | 100 $\mu$ M                                 | in vitro; mouse                                | Inhibited differentiation of OPCs; inhibited MBP expression                                                                                                                                                                                                                                                                                                                         | Seiwa et al. 2004  |
| 2,4-Dichlorophenoxyacetic acid (2,4-D)         | 1000 $\mu$ M          | Cytotoxicity limit                                      | EPA ToxCast        | 70 mg/kgBW (DMSO)                           | in vivo; rat                                   | Decreased myelin proteins (CNPase, PLP, and MBP); disrupted myelin layers and reduced number of sheets (electronmicrograph)<br>*also no effect on myelin structure was found in DMSO treated group                                                                                                                                                                                  | Konjuh et al. 2008 |
| tris(1,3-dichloro-2-propyl) phosphate (TDCPP)  | 6.71 $\mu$ M          | Cytotoxicity limit                                      | EPA ToxCast        | 0.001% (v/v) DMSO                           | in vivo; zebrafish                             | Detected in F1 eggs following parental exposure; MBP significantly downregulated in exposed F1 larvae                                                                                                                                                                                                                                                                               | Wang et al. 2015   |
| Bis(cyclohexanone) oxaldihydrazone (Cuprizone) |                       |                                                         |                    | 0.2% diet                                   | in vivo; mouse                                 | Demyelination in juvenile (3 weeks) and young-adult mice (6 weeks); reduction of myelin basic protein; loss of CC-1-positive mature oligodendrocytes                                                                                                                                                                                                                                | Wang et al. 2013   |
|                                                |                       |                                                         |                    | 0, 0.1 or 0.4% diet                         | in vivo; rat                                   | Maternal exposure to 0.4% CPZ in the diet from gestational day 6 to day 21 decreases proliferative type-2 progenitor cells via endoplasmic reticulum stress-mediated apoptosis and inhibition of cholinergic signals to intermediate-stage progenitor cells following reduced oligodendrocyte production and suppression of the brain-derived neurotrophic factor signaling cascade | Abe et al. 2015    |
|                                                |                       |                                                         |                    | 25 $\mu$ M (for 1 hour, each day 2-12 days) | in vitro; rat OL and mixed glial-cell cultures | Treatment with cuprizone produced a slight decrease in the total number of O4-positive oligodendrocytes; cuprizone consistently and significantly reduced the numbers of the O4-positive cells that would mature to the O4+/MBP+ stage                                                                                                                                              | Cammer, 1999       |

|                                  |              |                                                          |                      |                                           |                            |                                                                                                                                                                                                                        |                      |
|----------------------------------|--------------|----------------------------------------------------------|----------------------|-------------------------------------------|----------------------------|------------------------------------------------------------------------------------------------------------------------------------------------------------------------------------------------------------------------|----------------------|
| Sodium metavanadate              | 300 $\mu$ M  | in vitro; mouse OL spheres; IC50                         | Mustapha et al. 2014 | 300 $\mu$ M                               | in vitro; mouse OL spheres | Decreased expression of oligodendrocyte specific proteins: CNPase, OSP / Claudin                                                                                                                                       | Mustapha et al. 2014 |
| Nicotine                         |              |                                                          |                      | 3 mg/kg BW                                | in vivo; rat               | Significantly altered myelin gene expression, indicating that exposure disturbs OL development and myelin formation                                                                                                    | Cao et al. 2013      |
| Pentabromodiphenyl oxide (DE-71) | 1000 $\mu$ M | Cytotoxicity limit                                       | EPA ToxCast          | 0.16, 0.8, 4.0 $\mu$ g/L H <sub>2</sub> O | in vivo; zebrafish         | Residue of DE-71 was detected in F1 eggs upon parental exposure; Genes of central nervous system development (e.g., myelin basic protein, synapsin IIa, $\alpha$ 1-tubulin) were significantly downregulated in larvae | Chen et al. 2012     |
|                                  | 500 mg/mL    | hippocampal neurons; 50% reduction in mitotic index      | Giordano et al. 2008 |                                           |                            |                                                                                                                                                                                                                        |                      |
|                                  | 2.2 $\mu$ M  | hippocampal neurons; IC50                                |                      |                                           |                            |                                                                                                                                                                                                                        |                      |
|                                  | 8.9 $\mu$ M  | SK-N-SH neuroblastoma; MTT reduction; threshold          | Yu et al. 2008       |                                           |                            |                                                                                                                                                                                                                        |                      |
|                                  | 22.1 $\mu$ M | SK-N-SH neuroblastoma; LDH release; threshold            |                      |                                           |                            |                                                                                                                                                                                                                        |                      |
|                                  | 6.4 $\mu$ M  | SK-N-SH neuroblastoma; apoptosis; PI staining; threshold |                      |                                           |                            |                                                                                                                                                                                                                        |                      |
| Methylmercury                    |              |                                                          |                      | 2 mg/kg BW                                | in vivo; rat               | Reductions in total and individual MBP splice variant mRNA levels suggest that methylmercury-induced perturbation in MBP gene expression occurred due to decreased oligodendrocyte cell population                     | Padhi et al. 2012    |

OL = oligodendrocyte

NSC = neural stem cell

OPC = oligodendrocyte progenitor cell

OSP = oligodendrocyte specific protein

MPB = myelin basic protein

PLP = myelin proteolipid protein

CNPase = 2',3'-Cyclic-nucleotide 3'-phosphodiesterase

## References

- Giordano G, Kavanagh TJ, Costa LG. 2008. Neurotoxicity of a polybrominated diphenyl ether mixture (DE-71) in mouse neurons and astrocytes is modulated by intracellular glutathione levels. *Toxicol Appl Pharmacol* 232(2):161-168; doi: 10.1016/j.taap.2008.06.018 [doi].
- Xu XB, Fan SJ, He Y, et al. Loss of hippocampal oligodendrocytes contributes to the deficit of contextual fear learning in adult rats experiencing early bisphenol A exposure. *Mol Neurobiol*. 2016.
- Tiwari SK, Agarwal S, Chauhan LK, Mishra VN, Chaturvedi RK. Bisphenol-A impairs myelination potential during development in the hippocampus of the rat brain. *Mol Neurobiol*. 2015;51(3):1395-1416.
- Seiwa C, Nakahara J, Komiyama T, Katsu Y, Iguchi T, Asou H. Bisphenol A exerts thyroid-hormone-like effects on mouse oligodendrocyte precursor cells. *Neuroendocrinology*. 2004;80(1):21-30.
- Duffard R, Garcia G, Rosso S, et al. Central nervous system myelin deficit in rats exposed to 2,4-dichlorophenoxyacetic acid throughout lactation. *Neurotoxicol Teratol*. 1996;18(6):691-696.
- Konjuh C, Garcia G, Lopez L, de Duffard AM, Brusco A, Duffard R. Neonatal hypomyelination by the herbicide 2,4-dichlorophenoxyacetic acid. chemical and ultrastructural studies in rats. *Toxicol Sci*. 2008;104(2):332-340.
- Wang Q, Lai NL, Wang X, et al. Bioconcentration and transfer of the organophorous flame retardant 1,3-dichloro-2-propyl phosphate causes thyroid endocrine disruption and developmental neurotoxicity in zebrafish larvae. *Environ Sci Technol*. 2015;49(8):5123-5132.
- Wang H, Li C, Wang H, et al. Cuprizone-induced demyelination in mice: Age-related vulnerability and exploratory behavior deficit. *Neurosci Bull*. 2013;29(2):251-259.
- Chen L, Yu K, Huang C, et al. Prenatal transfer of polybrominated diphenyl ethers (PBDEs) results in developmental neurotoxicity in zebrafish larvae. *Environ Sci Technol*. 2012;46(17):9727-9734.
- Mustapha O, Oke B, Offen N, Siren AL, Olopade J. Neurobehavioral and cytotoxic effects of vanadium during oligodendrocyte maturation: A protective role for erythropoietin. *Environ Toxicol Pharmacol*. 2014;38(1):98-111.
- Cao J, Wang J, Dwyer JB, et al. Gestational nicotine exposure modifies myelin gene expression in the brains of adolescent rats with sex differences. *Transl Psychiatry*. 2013;3:e247.

Padhi BK, Pelletier G. Perturbation of myelin basic protein (mbp) splice variant expression in developing rat cerebellum following perinatal exposure to methylmercury. *Toxicol Lett.* 2012;213(3):374-380.

Yu K, He Y, Yeung LW, Lam PK, Wu RS, Zhou B. 2008. DE-71-induced apoptosis involving intracellular calcium and the bax-mitochondria-caspase protease pathway in human neuroblastoma cells in vitro. *Toxicol Sci* 104(2):341-351; doi: 10.1093/toxsci/kfn088 [doi].

Eskes C, Honegger P, Jones-Lepp T, Varner K, Matthieu JM, Monnet-Tschudi F. Neurotoxicity of dibutyltin in aggregating brain cell cultures. *Toxicol In Vitro.* 1999;13(4-5):555-560.

Chantong B, Kratschmar DV, Lister A, Odermatt A. Dibutyltin promotes oxidative stress and increases inflammatory mediators in BV-2 microglia cells. *Toxicol Lett.* 2014;230(2):177-187.

EPA ToxCast - <https://actor.epa.gov/dashboard>

PubChem - <https://pubchem.ncbi.nlm.nih.gov>
